# Supplementary material for: Investigation on two new antimony-based quaternary chalcogenides: Na6CdSb4S10 and Na3CdSbSe4
Source: Royal Society of Chemistry journal article supplement (doi:10.1039/c8nj04072a), 2019-01-01
Supplement: c8nj04072a1.pdf [file c8nj04072a1.pdf]

## Electronic Supplementary Information

### Investigation on two new antimony-based quaternary chalcogenides:

#### $\text{Na}_6\text{CdSb}_4\text{S}_{10}$ and $\text{Na}_3\text{CdSbSe}_4$ Generation Response

Yi Huang,<sup>a</sup> Xiaowen Wu,<sup>b,\*</sup> Sadeh Beysen<sup>a,\*</sup>

a. School of Physics Science and Technology, Xinjiang University, Urumqi, Xinjiang 830046, China.

b. College of Chemistry and Chemical Engineering, Xinjiang Normal University, Urumqi 830017, China.

To whom correspondence should be addressed:

\* E-mail: wuxiaowen1114@163.com (Xiaowen Wu).

\* E-mail: beysensadeh@163.com (Sadeh Beysen).

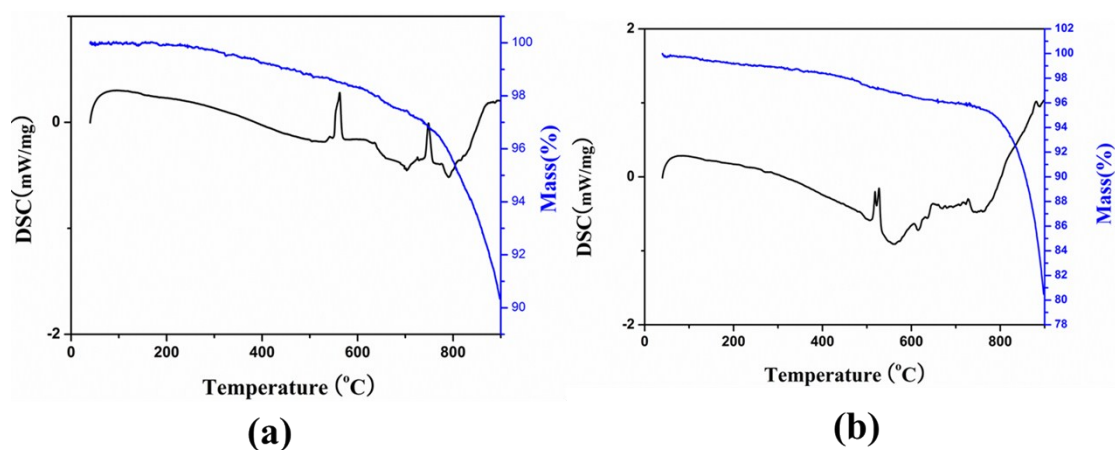

**Fig. S1.** The thermogravimetric (TG) and differential scanning calorimetry (DSC) curves of  $\text{Na}_6\text{CdSb}_4\text{S}_{10}$  (a) and  $\text{Na}_3\text{CdSbSe}_4$  (b).
